# Supplementary material for: HIV-1 subtype diversity, transmission networks and transmitted drug resistance amongst acute and early infected MSM populations from Coastal Kenya
Source: PubMed Central journal article supplement (PMC6298690; doi:10.1371/journal.pone.0206177), 2018-12-18
Supplement: pone.0206177.s005.pdf [file pone.0206177.s005.pdf]

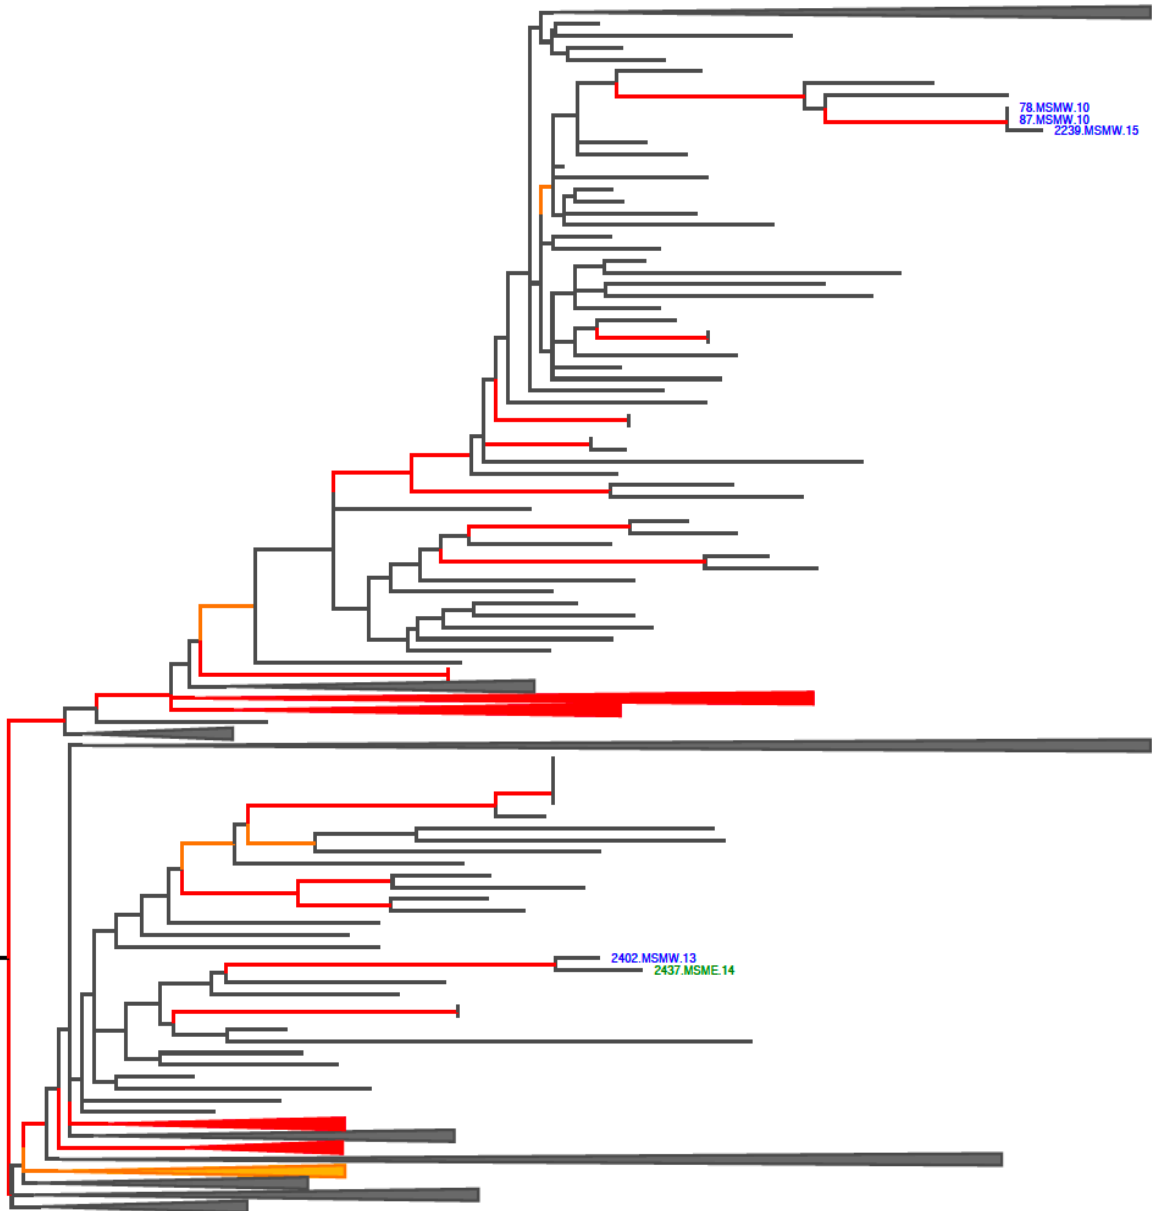

0.02
